# Supplementary material for: Poaching Threatens the Establishment of a Lynx Population, Highlighting the Need for a Centralized Judiciary Approach
Source: Frontiers journal article supplement (doi:10.3389/fcosc.2021.665000), 2021-06-07
Supplement: Image_1.pdf [file Image_1.pdf]

*Supplementary material*

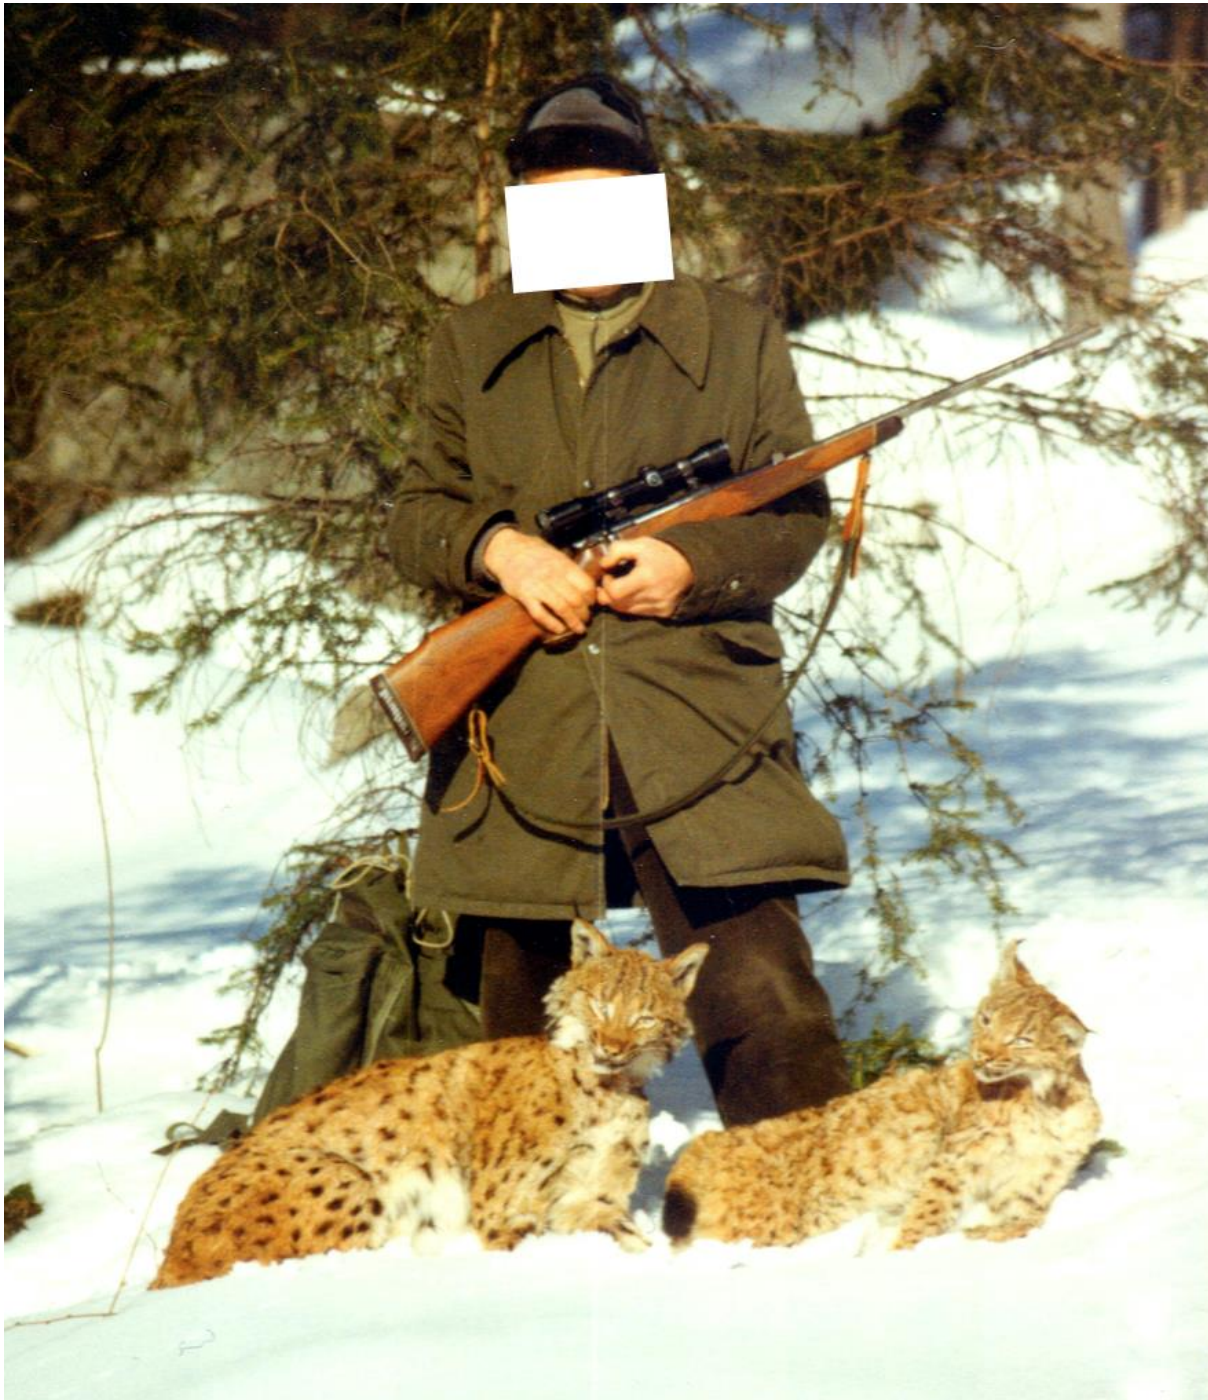

**Supplementary Figure 1.** The hunter X, eventually convicted for illegal hunting in 2015, staging with two dead lynx and a gun (by courtesy of the photographer, Jean-Claude Tornay). The contorted position of their heads indicates that the two lynx have been strangled and not shot, which could be assessed by one of the authors while visiting the armory where one of these two lynx, recognizable by its fur pattern, was long exposed stuffed.
