# Supplementary material for: Poaching Threatens the Establishment of a Lynx Population, Highlighting the Need for a Centralized Judiciary Approach
Source: Frontiers journal article supplement (doi:10.3389/fcosc.2021.665000), 2021-06-07
Supplement: Image_2.pdf [file Image_2.pdf]

## Supplementary material

a)

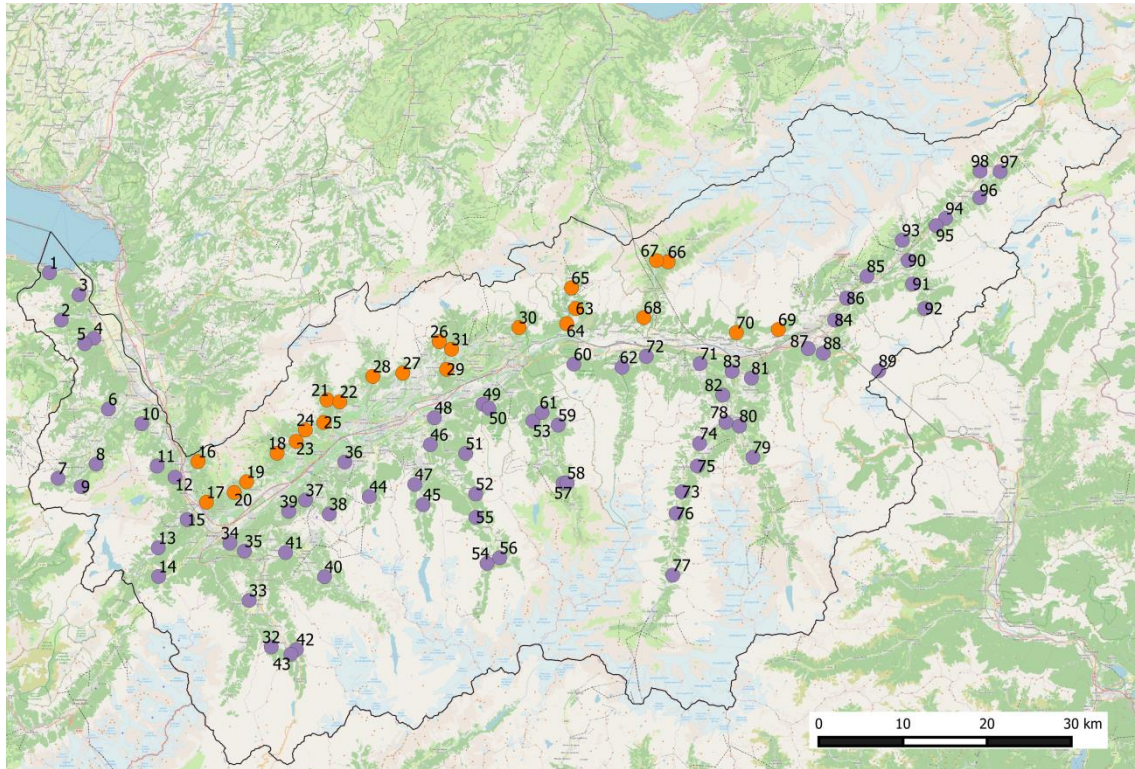

b)

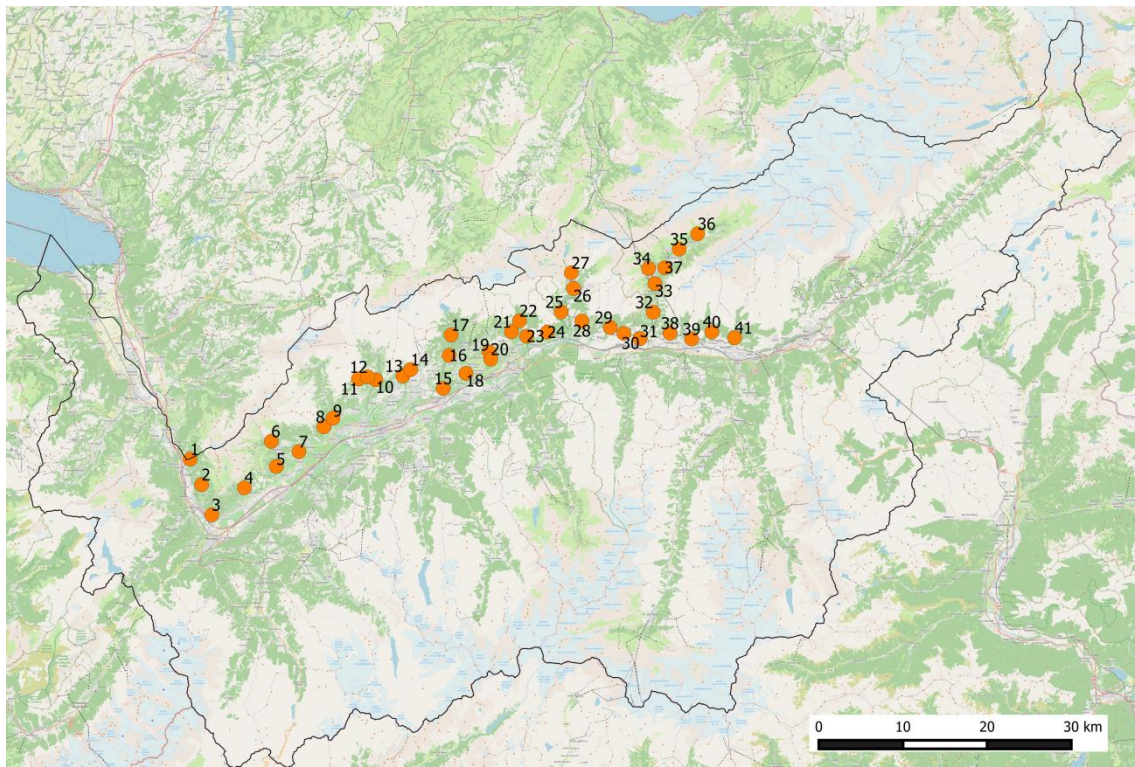

**Supplementary Figure 2:** Locations of the camera-traps deployed by the two survey schemes: a) Bern University, b) KORA. The camera traps used by the two institutions to simultaneously record lynx in winter 2013/2014 in the Northwestern part of Valais are shown in orange. The camera ID's correspond to the ID's in Data S1.
