# Supplementary material for: Poaching Threatens the Establishment of a Lynx Population, Highlighting the Need for a Centralized Judiciary Approach
Source: Frontiers journal article supplement (doi:10.3389/fcosc.2021.665000), 2021-06-07
Supplement: Image_3.pdf [file Image_3.pdf]

*Supplementary material*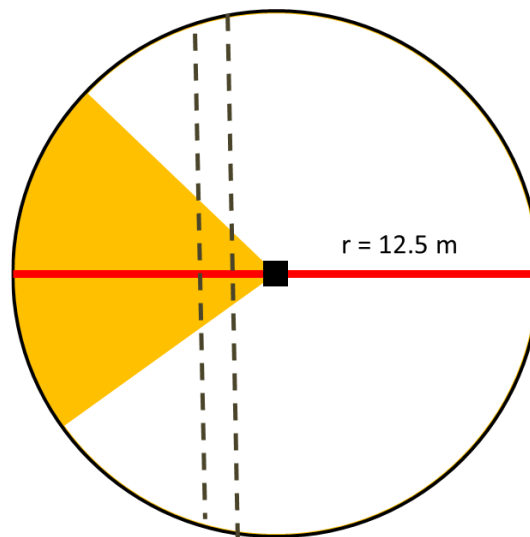

**Supplementary Figure 3:** Environmental conditions in the vicinity of a trail camera-trap were assessed either within a 12.5-m radius plot centered on the camera (depicted by a black square) or along a 25-m long transect (red line). The yellow triangle symbolises the approximate camera coverage. The dashed lines depict a dirt road or trail where a lynx is expected to transit.
